# Supplementary material
Source: MDPI journal article supplement (https://www.mdpi.com/2079-6412/11/11/1346)
Supplement: s1 [file s1]

# Supplementary Materials: Effective Detoxification of Aflatoxin B1 and Ochratoxin A Using Magnetic Graphene Oxide Nanocomposite: Isotherm and Kinetic Study

Atena Abbasi Pirouz <sup>1,2</sup>, Jinap Selamat <sup>1,2,\*</sup>, Rashidah Sukor <sup>1,2</sup> and Nuzul Noorahya Jambari <sup>1,2</sup>

<sup>1</sup> Food Safety and Food Integrity (FOSFI), Institute of Tropical Agriculture and Food Security, Universiti Putra Malaysia, Serdang 43400, Selangor, Malaysia; atenapirouz.upm@gmail.com (A.A.P.); rashidah@upm.edu.my (R.S.); noorahya@upm.edu.my (N.N.J.)

<sup>2</sup> Department of Food Science, Faculty of Food Science and Technology, Universiti Putra Malaysia, Serdang 43400 UPM, Selangor, Malaysia

\* Correspondence: jinap@upm.edu.my or sjinap@gmail.com

**Citation:** Pirouz, A.A.; Selamat, J.; Sukor, R.; Noorahya Jambari, N. Effective Detoxification of Aflatoxin B1 and Ochratoxin A Using Magnetic Graphene Oxide Nanocomposite: Isotherm and Kinetic Study. *Coatings* **2021**, *11*, 1346. <https://doi.org/10.3390/coatings11111346>

Received: 1 August 2021

Accepted: 14 September 2021

Published: 2 November 2021

**Publisher's Note:** MDPI stays neutral with regard to jurisdictional claims in published maps and institutional affiliations.

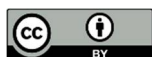

**Copyright:** © 2021 by the authors. Submitted for possible open access publication under the terms and conditions of the Creative Commons Attribution (CC BY) license (<http://creativecommons.org/licenses/by/4.0/>).

Table S1. Matrix of the central composite design (CCD).

| RunOrder | PtType | Blocks | pH | Time | Temperature | AFB <sub>1</sub> | OTA   |
|----------|--------|--------|----|------|-------------|------------------|-------|
| 1        | 1      | 1      | 3  | 3    | 30          | 61.29            | 41.47 |
| 2        | 1      | 1      | 7  | 7    | 30          | 30.45            | 21.58 |
| 3        | 1      | 1      | 7  | 3    | 50          | 90.32            | 59.74 |
| 4        | 1      | 1      | 3  | 7    | 50          | 87.1             | 53.42 |
| 5        | 0      | 1      | 5  | 5    | 40          | 94.84            | 58.32 |
| 6        | 0      | 1      | 5  | 5    | 40          | 93.03            | 57.16 |
| 7        | 1      | 2      | 7  | 3    | 30          | 87.1             | 46.58 |
| 8        | 1      | 2      | 3  | 7    | 30          | 87.1             | 50    |
| 9        | 1      | 2      | 3  | 3    | 50          | 76.55            | 44.11 |
| 10       | 1      | 2      | 7  | 7    | 50          | 41.94            | 37.37 |
| 11       | 0      | 2      | 5  | 5    | 40          | 93.06            | 58.53 |
| 12       | 0      | 2      | 5  | 5    | 40          | 93.87            | 58.84 |
| 13       | -1     | 3      | 3  | 5    | 40          | 96.77            | 60.79 |
| 14       | -1     | 3      | 7  | 5    | 40          | 77.42            | 55.11 |
| 15       | -1     | 3      | 5  | 3    | 40          | 90.32            | 50    |
| 16       | -1     | 3      | 5  | 7    | 40          | 84.19            | 45.11 |
| 17       | -1     | 3      | 5  | 5    | 30          | 93.55            | 52.89 |
| 18       | -1     | 3      | 5  | 5    | 50          | 89.35            | 59.97 |
| 19       | 0      | 3      | 5  | 5    | 40          | 92.26            | 57.42 |
| 20       | 0      | 3      | 5  | 5    | 40          | 94.19            | 58.89 |

Table S2. F-ratio and *p*-value for each independent variable effect in the polynomial response surface models.

| Response                           |                 | Linear Effects |                |                | Quadratic Effects           |                             |                             | Interaction Effects           |                               |                               |
|------------------------------------|-----------------|----------------|----------------|----------------|-----------------------------|-----------------------------|-----------------------------|-------------------------------|-------------------------------|-------------------------------|
|                                    |                 | X <sub>1</sub> | X <sub>2</sub> | X <sub>3</sub> | X <sub>1</sub> <sup>2</sup> | X <sub>2</sub> <sup>2</sup> | X <sub>3</sub> <sup>2</sup> | X <sub>1</sub> X <sub>2</sub> | X <sub>1</sub> X <sub>3</sub> | X <sub>2</sub> X <sub>3</sub> |
| AFB <sub>1</sub> (Y <sub>2</sub> ) | <i>p</i> -value | 0.00           | 0.002          | 0.3*           | 0.11                        | 0.001                       | -                           | 0.00                          | -                             | -                             |
|                                    | F-Value         | 63.11          | 51.52          | 55.81          | 21.9                        | 21.9                        | -                           | 120.52                        | -                             | -                             |
| OTA (Y <sub>6</sub> )              | <i>p</i> -value | 0.26*          | 0.001          | 0.151*         | -                           | 0.00                        | 0.00                        | 0.034                         | 0.001                         | -                             |
|                                    | F-Value         | 1.38           | 18.26          | 2.33           | -                           | 82.82                       | 23.13                       | 5.62                          | 16.16                         | -                             |

X<sub>1</sub>, X<sub>2</sub> and X<sub>3</sub> represent the main effect pH, time and temperature

X<sub>1</sub><sup>2</sup>, X<sub>2</sub><sup>2</sup> and X<sub>3</sub><sup>2</sup> represent the quadratic effect pH, time and temperature

X<sub>1</sub>X<sub>2</sub>, X<sub>1</sub>X<sub>3</sub>, X<sub>2</sub>X<sub>3</sub> represent the interaction between pH and time, pH and temperature, time and temperature

\* Not significant at *p* < 0.05

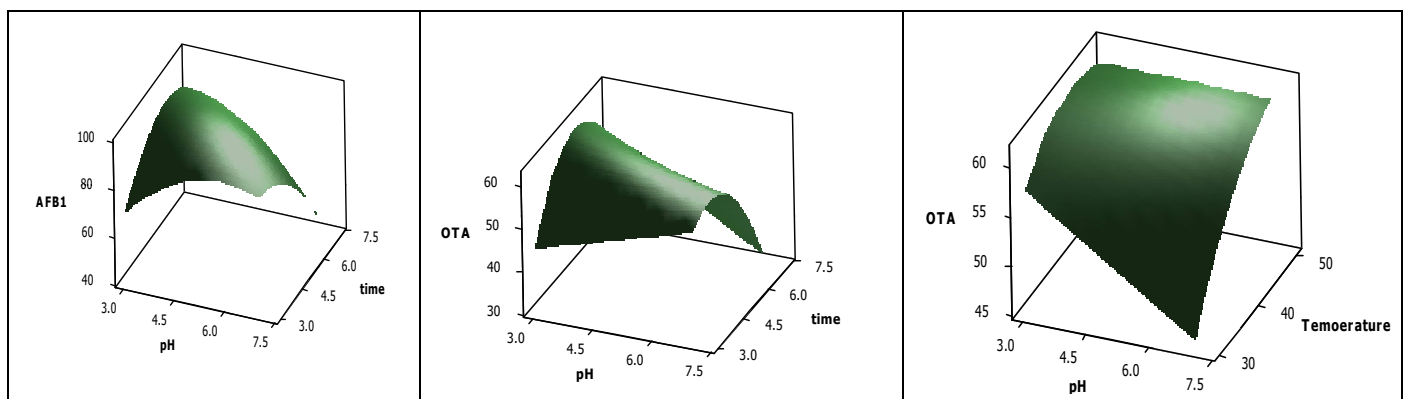

**Figure S1.** Response surface plots of significant (*p* < 0.05) interaction effect of variables on the reduction of the mycotoxins with MGO.
